## AN ANALYSIS OF CHANGES IN BLOOD pH FOLLOWING EXHAUSTING ACTIVITY IN THE STARRY FLOUNDER, *PLATICHTHYS STELLATUS*

By CHRIS M. WOOD,\* B. R. McMAHON  
AND D. G. McDONALD

*Department of Biology, University of Calgary,  
Calgary, Alberta, Canada T2N 1N4*

(Received 13 December 1976)

### SUMMARY

Exhausting activity results in a marked and immediate drop in blood pH which gradually returns to normal over the following 6 h. The acidosis is caused largely by elevated  $P_{\text{CO}_2}$  levels, which vary inversely with pH. Blood lactate concentration increases slowly, reaching a maximum at 2-4 h post-exercise, and contributes significantly to the acidosis only late in the recovery period. The slow time course of lactic acid release into the blood permits temporal separation of the peak metabolic acidosis from the peak respiratory acidosis. Evidence is presented that a metabolic acid other than lactic also makes a modest contribution to the pH depression during the recovery period.

### INTRODUCTION

In man, strenuous exercise results in the accumulation of lactic acid in the blood stream. The change in blood lactate concentration is rapid; a peak is reached within a few minutes post-exercise, and resting levels are re-established in about 1 h (Bang, 1936; Crescitelli & Taylor, 1944). The accompanying disturbance in the acid/base status of the blood appears largely attributable to this lactacidosis. There is a strong correlation between blood lactate concentration and pH, and the increase in base deficit can be almost entirely accounted for by the rise in lactic acid (Laug, 1934; Visser, Kreukniet & Maas, 1964; Keul, Keppler & Doll, 1967). Hyperventilation during exercise causes a slight decrease in  $P_{\text{a,CO}_2}$ , even in the face of a small increase in  $P_{\text{v,CO}_2}$  due to elevated tissue metabolism, but the influence of these  $P_{\text{CO}_2}$  alterations on blood pH is minimal (Astrand & Rodahl, 1970).

In fish, the levels of blood lactate ultimately attained after exercise are similar to those in mammals, but the time course of the response is much slower (Secondat & Diaz, 1942; Auvergnat & Secondat, 1942; Black *et al.* 1959; Black, Manning & Hayashi, 1966; Piiper, Meyer & Drees, 1972). Peak concentrations are reached in 2-4 h, and up to 24 h may be required for a complete return to resting levels. In general, blood pH reaches a minimum before the lactate peak and returns to normal

\* Present address: Department of Biology, McMaster University, 1280 Main Street West, Hamilton Ontario, Canada L8S 4K1.

over a faster time course. Relationships between blood  $[\text{HCO}_3^-]$  and lactate appear variable. Despite these inconsistencies, previous workers have offered an essentially mammalian interpretation of their data - i.e. the increase in lactic acid causes a drop in pH and a decrease in  $[\text{HCO}_3^-]$ . The possible influence of changes in blood  $P_{\text{CO}_2}$  has been ignored. Nevertheless, evidence is available that both  $P_{\text{a,CO}_2}$  and  $P_{\text{v,CO}_2}$  may increase during and after swimming activity in fish (Stevens & Randall, 1967; Piiper *et al.* 1972), although the absolute changes are small (a few mmHg). There is a linear/log relationship between pH and  $P_{\text{CO}_2}$ ; changes in  $P_{\text{CO}_2}$  around 2 mmHg (fish levels) will have a marked effect on pH compared with changes of the same magnitude around 40 mmHg (mammalian levels) (Randall & Cameron, 1973).

The aim of the present investigation was, therefore, to examine the relative roles of lactic acid and  $P_{\text{CO}_2}$  levels in changing blood pH following strenuous activity in a teleost fish. *Platichthys stellatus* was chosen for study as it can be quickly exercised to exhaustion by manual chasing, and can be chronically cannulated without difficulty. In lactate studies, the importance of blood sampling via indwelling cannulae (i.e. without disturbance to the animal) has recently been documented (Driedzic & Kiceniuk, 1976).

#### MATERIALS AND METHODS

Starry flounders (*Platichthys stellatus* Pallas; 300–800 g) were collected by otter trawl from East Sound of Orcas Island and held in large sand covered tanks for at least 10 days before use at Friday Harbor Laboratories, University of Washington. The acclimation conditions were those employed in subsequent experiments: running sea water, salinity =  $27 \pm 1\text{‰}$ , temperature =  $9 \pm 1^\circ\text{C}$ .

##### I. In vitro experiments

*In vitro* determinations of  $\text{CO}_2$  combining curves and buffer capacities were performed on heparinized whole blood taken by blind puncture of the haemal arch. Samples were placed in 50 ml tonometer shaker flasks (5 ml/flask) at  $9 \pm 0.5^\circ\text{C}$  and gassed for at least 2.5 h with humidified mixtures of  $\text{CO}_2$  in air supplied by Wosthoff mixing pumps fed from analysed gas cylinders.

##### II. In vivo experiments

For all *in vivo* experiments, the fish ( $N = 6$ ) were anaesthetized on an operating table with 1:15000 MS-222 and the caudal vein chronically catheterized with Clay-Adams PE 50 as described by Watters & Smith (1973). In one animal, the caudal artery was similarly cannulated. The wound was dusted with the fish antibiotic 'Furanace' (Nifurpironol, Dainippon Pharmaceutical) and closed with silk sutures. The animals were then transferred to individual chambers (30 × 30 cm and 15 cm deep) and allowed to recover for at least 72 h. The chambers were shielded from the investigators and were filled to a depth of 6 cm with fine beach sand. As in the main holding tanks, the flounder in the experimental chambers remained typically buried with only the eyes and mouth exposed. The use of sand was important, for fish held in bare tanks exhibited a good deal of spontaneous activity which would have confounded the objectives of this study.

Several initial blood samples, totalling about 1.0 ml, were drawn from the cathet

Before the imposition of swimming activity. The animal was then quickly transferred to a larger tank (100 × 100 cm and 20 cm deep) and exercised by manual chasing for 10 min. By the end of the exercise period, all fish became completely refractory to stimulation and were unable to right themselves, indicating that this procedure produced exhaustion. A blood sample (0.5 ml) was taken immediately post-exercise (time 0), and the flounder returned to its individual compartment. Additional samples (0.5 ml) were removed at 20 min, 1 h, 2 h, 4 h, 6 h, and 24 h. Blood samples were taken without any apparent disturbance to the animal.

### III. Analytical procedures

Blood was drawn anaerobically. All *in vitro* samples were analysed for pH, total  $\text{CO}_2$ , and haematocrit. All *in vivo* samples were assayed for pH, lactate, and haematocrit. The initial blood samples from each animal were analysed for  $P_{\text{CO}_2}$  and total  $\text{CO}_2$ . In two fish, total  $\text{CO}_2$  measurements were also performed on the post-exercise series of samples.

Lactate analyses were performed on 250  $\mu\text{l}$  blood samples immediately deproteinized in 500  $\mu\text{l}$  ice-cold perchloric acid. The supernatant was analysed enzymatically (lactic dehydrogenase) for L-lactate with Sigma reagents (see Sigma bulletin no. 826-UV). Blood pH's were determined by injecting 50  $\mu\text{l}$  aliquots directly into a Radiometer micro-electrode connected to a Radiometer PHM 71 acid-base analyser and thermostatted to the experimental temperature. Measurements of blood  $P_{\text{CO}_2}$  were performed on 200  $\mu\text{l}$  samples with a thermostatted Radiometer  $\text{CO}_2$  electrode fitted with a thin silicone membrane and connected to the PHM 71.  $P_{\text{CO}_2}$  determinations were relatively imprecise due to the necessity of using high meter gain and a long response time (8–10 min) for the low  $P_{\text{CO}_2}$  levels in fish blood at 9 °C. Each sample was bracketed by calibration gas standards from analysed cylinders, and multiple determinations were performed on each fish. Nevertheless, error may have reached  $\pm 20\%$ . Blood total  $\text{CO}_2$  levels (25–50  $\mu\text{l}$  samples) were assayed by the micro-method of Cameron (1971), using a Teflon membrane on the  $P_{\text{CO}_2}$  electrode for greater stability and bracketing each unknown by sodium bicarbonate standards. Haematocrits were measured by centrifuging 50  $\mu\text{l}$  blood samples in ammonium heparinized capillary tubes at 5000  $g$  for 5 min.

### IV. Theoretical approach

To evaluate the relative contributions of alterations in  $P_{\text{CO}_2}$  and lactic acid to the total pH change observed, an approach similar to that outlined by Woodbury (1965) and Davenport (1974) was adopted. A Davenport diagram (e.g. Fig. 1), which relates pH to  $[\text{HCO}_3^-]$  at various  $P_{\text{CO}_2}$ 's was constructed using the Henderson-Hasselbalch equation:

$$\text{pH} = \text{pK}^1 + \log \frac{[\text{HCO}_3^-]}{\alpha \text{CO}_2 \cdot P_{\text{CO}_2}},$$

where  $\text{pK}^1$  is the negative logarithm of the apparent first dissociation constant of carbonic acid and  $\alpha \text{CO}_2$  is the physical solubility of  $\text{CO}_2$  in plasma.  $[\text{HCO}_3^-]$  equals the difference between total  $\text{CO}_2$  concentration and  $\alpha \text{CO}_2 \cdot P_{\text{CO}_2}$ . As the ionic activity of fish plasma is fairly close to that of mammalian plasma (Albers, 1970), values for

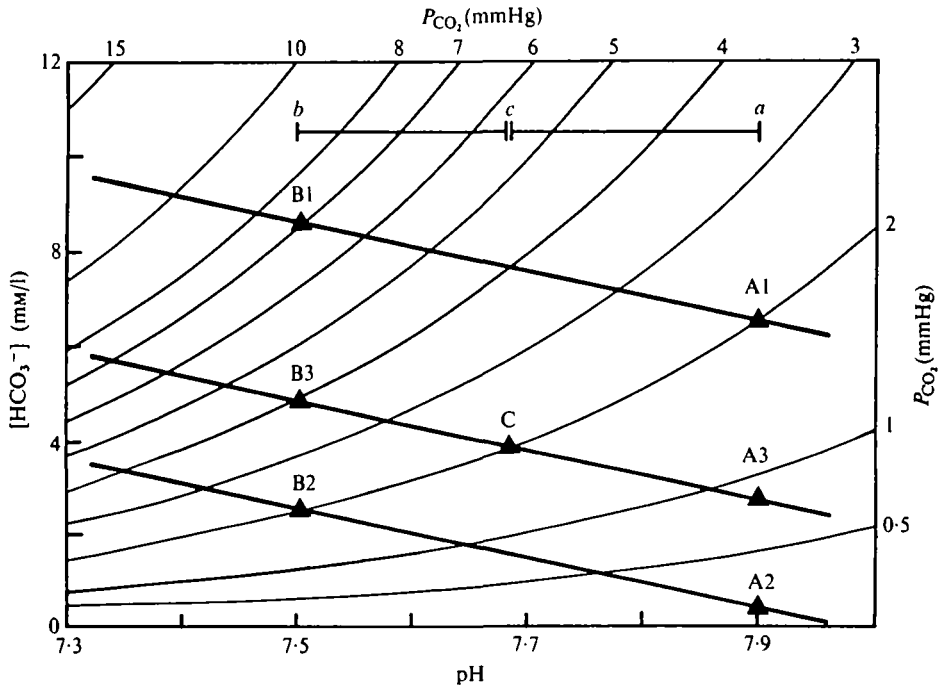

Fig. 1. Davenport diagram for flounder blood relating  $[\text{HCO}_3^-]$ , pH, and  $P_{\text{CO}_2}$  (isopleths in mmHg). Parallel lines  $A_1B_1$ ,  $A_2B_2$ , and  $A_3B_3$  represent buffer lines of slope  $\beta$  as determined *in vitro*. The figure illustrates the method employed in determining the fraction of a total pH drop (horizontal distance  $ab$ ) which would have been due to lactic acid changes alone ( $ac/ab$ ) and the additional fraction due to  $P_{\text{CO}_2}$  changes ( $bc/ab$ ).  $A_1$  = initial point at rest.  $A_1B_1$ : pH drop is due solely to  $P_{\text{CO}_2}$  increase.  $A_2B_2$ : pH drop is due solely to lactic acid increase.  $A_3B_3$ : pH drop is due to both factors. See text for further details.

$\text{pK}^1$  and  $\alpha\text{CO}_2$  at the experimental temperature and pH were taken from tabulated mammalian figures (Severinghaus, 1965; Albers, 1970).

Blood is a complex buffering system containing both non-bicarbonate (protein) and bicarbonate buffers. A change in  $P_{\text{CO}_2}$  will titrate only the non-bicarbonate buffers; the slope of this buffer line ( $\beta = \Delta[\text{HCO}_3^-]/\Delta\text{pH}$ ) can be determined *in vitro* by equilibrating whole blood at various  $P_{\text{CO}_2}$ 's (Piiper *et al.* 1972). However, the addition of any non-carbonic acid (e.g. lactic acid) to blood will titrate both the carbonic acid and protein buffers; the amount of added acid will be proportional, but not equal, to the decrease in  $[\text{HCO}_3^-]$ .

The initial *in vivo* blood sample from the resting animal is plotted as point  $A_1$  (Fig. 1). A buffer line with slope  $\beta$  is plotted through  $A_1$ . If a post-exercise decrease in pH (horizontal distance  $ab$ ) is due solely to a change in  $P_{\text{CO}_2}$ , then the blood will simply be titrated along the buffer line to point  $B_1$ . On the other hand, if the same post-exercise change in pH ( $ab$ ) is due solely to an increase in lactic acid, then the blood will be titrated along a constant  $P_{\text{CO}_2}$  isopleth to  $B_2$ . A second buffer line with slope  $\beta$  may be constructed through  $B_2$ . At the original pH on this second buffer line (point  $A_2$ ), the vertical distance  $A_1A_2$  equals the amount of lactic acid added (in  $[\text{HCO}_3^-]$  equivalents). The vertical distance  $A_1B_2$  (the actual decrease in  $[\text{HCO}_3^-]$ ) is the amount buffered by the carbonic acid system, and  $A_2B_2$  ( $\Delta\text{pH} \times \beta$ ) is the amount buffered by proteins.

However, it is more probable that *in vivo*, a pH change (*ab*) will have both a lactic acid and a  $P_{\text{CO}_2}$  component. Metabolically, L-lactate and  $\text{H}^+$  ions are produced and removed in equivalent quantities (Piiper *et al.* 1972) so the amount of added lactic acid added can be considered equal to that of the measured L-lactate ion. This measured change in lactic acid can be plotted (in  $[\text{HCO}_3^-]$  equivalents) as vertical distance  $\text{A}_1\text{A}_3$ . Another buffer line with slope  $\beta$  can be plotted through  $\text{A}_3$ ; this line will intersect the final pH at point  $\text{B}_3$ . The intersection of this buffer line with the original  $P_{\text{CO}_2}$  isopleth indicates the point (C) which would have been reached due to the increase in lactic acid alone in the absence of a  $P_{\text{CO}_2}$  change. The additional effect of a  $P_{\text{CO}_2}$  rise causes the pH to decrease further to  $\text{B}_3$ . Therefore *ac* is the pH drop which would have been caused by the rise in lactic acid alone, and *bc* the additional decrement due to the  $P_{\text{CO}_2}$  increase.

If the observed point  $\text{B}_3$  does not agree with the point  $\text{B}_3$  predicted by the above procedure, then the situation is more complex than the assumptions of the analysis. For example, acids other than lactic may be entering the blood (observed  $\text{B}_3$  below predicted  $\text{B}_3$ ), or the blood may be losing and/or accumulating  $\text{HCO}_3^-$  and  $\text{H}^+$  ions at differential rates so as to either raise pH (observed  $\text{B}_3$  above predicted  $\text{B}_3$ ) or lower pH (observed  $\text{B}_3$  below predicted  $\text{B}_3$ ) at the *in vivo*  $P_{\text{CO}_2}$ . Nevertheless, *ac/ab* will still equal the fraction of the total pH change which would have been caused by the increase in lactic acid alone.

The above approach was originally designed for the mammalian system. However, it depends only on physico-chemical principles which should be identical in fish and mammalian blood. Therefore its application to the fish system appears valid, subject to the accuracies of the values of  $\text{pK}^1$  and  $\alpha\text{CO}_2$  employed.

## RESULTS

### I. In vitro experiments

$\text{CO}_2$  combining curves in the physiological range of  $P_{\text{CO}_2}$  for fish were determined on five different batches of whole blood ranging in mean haematocrit from 1% to 16%. Results for the 16% haematocrit (pooled blood from four animals) are shown in Fig. 2A and the form is typical of all experiments. The only variation was a tendency for upward displacement of the curve (i.e. an increase in  $\text{CO}_2$  combining capacity) as haematocrit decreased. Within each batch of blood, haematocrit increased with  $P_{\text{CO}_2}$ ; in the example shown (Fig. 2A), haematocrit rose from 14.5% to 17.4% between  $P_{\text{CO}_2} = 0.52$  and 8.64 mmHg.

For each batch of blood, the non-bicarbonate buffer value ( $\beta$ ) was determined as the slope of the line relating  $[\text{HCO}_3^-]$  to pH (e.g. Fig. 2B).  $\beta$  varied with haematocrit – i.e.  $\beta = -3.6 \text{ mm l}^{-1} \text{ pH}^{-1}$  at 1% haematocrit,  $-4.2 \text{ mm l}^{-1} \text{ pH}^{-1}$  at 9%, and  $-5.2 \text{ mm l}^{-1} \text{ pH}^{-1}$  at 16%. The latter value ( $\beta = -5.2 \text{ mm l}^{-1} \text{ pH}^{-1}$ ) was the figure employed in the subsequent analysis of the *in vivo* results, as the mean initial and overall haematocrits of the animals in these experiments were  $16.1 \pm 1.2\%$  (6) [ $\bar{x} \pm 1 \text{ S.E. (N)}$ ] and  $14.2 \pm 1.0\%$  (6) respectively (Fig. 3). The temporal changes in haematocrit were small enough to render the use of a single value for  $\beta$  an insignificant source of error. The log/linear relationship between  $P_{\text{CO}_2}$  and pH in flounder blood

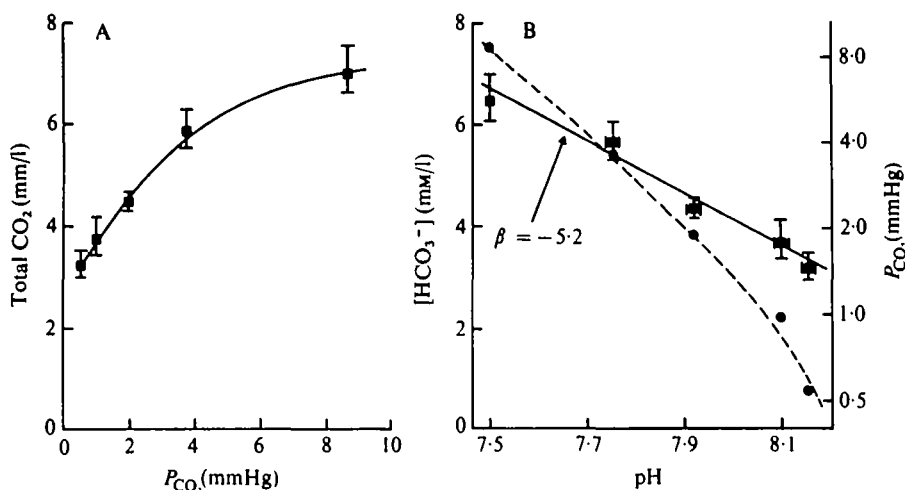

Fig. 2. (A) CO<sub>2</sub> combining curves and (B) buffer lines for [HCO<sub>3</sub><sup>-</sup>]/pH (■) and log P<sub>CO<sub>2</sub></sub>/pH (●) in flounder blood *in vitro*. Pooled blood from four animals. Mean haematocrit = 16.0%. Means and range shown for 3–4 determinations (total CO<sub>2</sub>, [HCO<sub>3</sub><sup>-</sup>]) or 2–3 determinations (pH) at each point. The slope of the [HCO<sub>3</sub><sup>-</sup>]/pH buffer line ( $\beta = -5.2 \text{ mM l}^{-1} \text{ pH}^{-1}$ ) was used in the subsequent analysis of the *in vivo* results.

is also shown in Fig. 2B, and illustrates the marked effect on pH of P<sub>CO<sub>2</sub></sub> variations in the physiological range.

## II. *In vivo* experiments

The initial lactate concentration in the venous blood of resting flounder ( $N = 6$ ) was extremely low ( $0.28 \pm 0.06 \text{ mM l}^{-1}$ ) and after 10 min of exhausting exercise had risen only about 1.8 fold (Fig. 3D). However, lactate levels continued to rise during recovery to a peak of 6–7 times the resting level at 2–4 h. By 24 h, the resting concentration was re-established.

Venous pH exhibited a very different pattern, dropping dramatically from 7.900 (6) to 7.516 (6) immediately post-exercise (Fig. 3C), and then slowly increasing towards the resting value during recovery, despite the accompanying rise in lactate. At 6 h, pH remained slightly depressed, but had returned to normal at 24 h. In the one fish with both arterial and venous cannulae, arterial pH varied in a similar pattern to venous pH, although the absolute changes were smaller (Fig. 3C). Consequently, the  $a-v$  difference in pH increased from 0.030 at rest to about 0.180 at 0 and 20 min, and then gradually returned to normal at 6 and 24 h. Arterial blood was analysed for lactate at time 0, 20 min, and 4 h. Within the error of the assay, no differences could be detected between arterial and venous lactate concentrations.

Despite the diluting effect of repetitive blood sampling, haematocrit actually increased slightly at 0 and 20 min after exercise (Fig. 3E). Haematocrit declined at subsequent sample times during recovery.

The initial venous P<sub>CO<sub>2</sub></sub> in resting flounder was  $2.88 \pm 0.20$  (6) mmHg as determined directly with a P<sub>CO<sub>2</sub></sub> electrode and the initial total venous CO<sub>2</sub> content was  $7.26 \pm 0.13$  (6) mm l<sup>-1</sup>. Using the Henderson–Hasselbalch equation, it was also possible to calculate P<sub>CO<sub>2</sub></sub> from the measured values of total CO<sub>2</sub> and pH for each fish. The resulting estimate,  $2.21 \pm 0.14$  (6) mmHg was lower than the direct measurement, but the

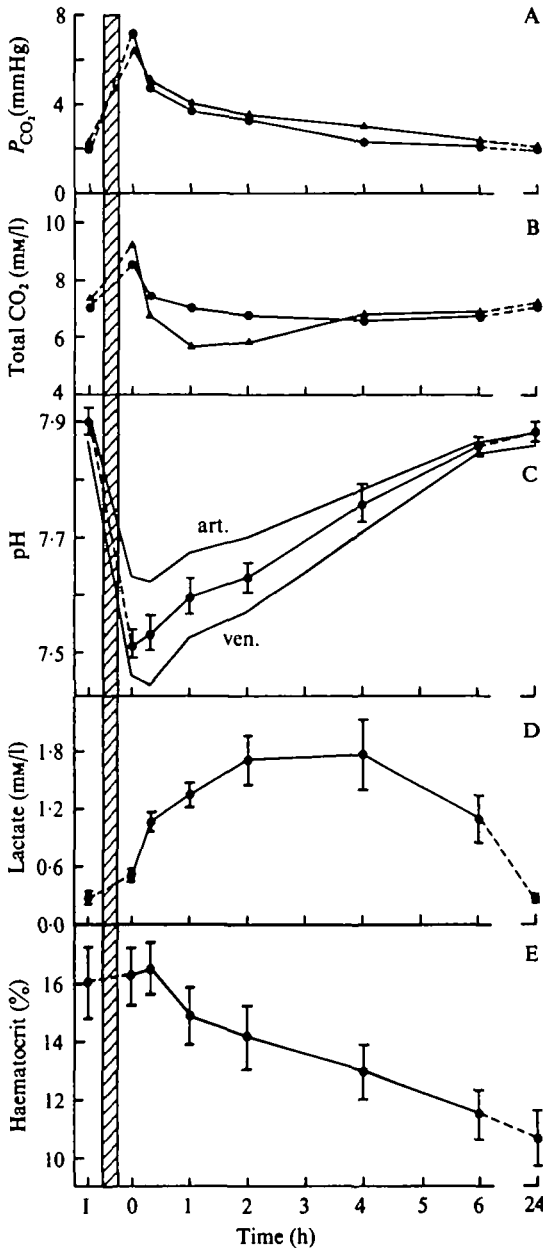

Fig. 3. (A)  $P_{CO_2}$  (as calculated by the Henderson-Hasselbalch equation) and (B) total  $CO_2$  concentration in the venous blood of two flounders (● = 800 g, ▲ = 450 g); average (C) pH, (D) lactate concentration, and (E) haematocrit in the venous blood of six flounders (means  $\pm$  1 S.E.) before and after 10 min of exhausting activity. In (C) simultaneous measurements of arterial and venous pH in a single flounder (330 g) are indicated by plain lines. Activity = bar. I = initial resting sample. Time 0 = immediately post-exercise.

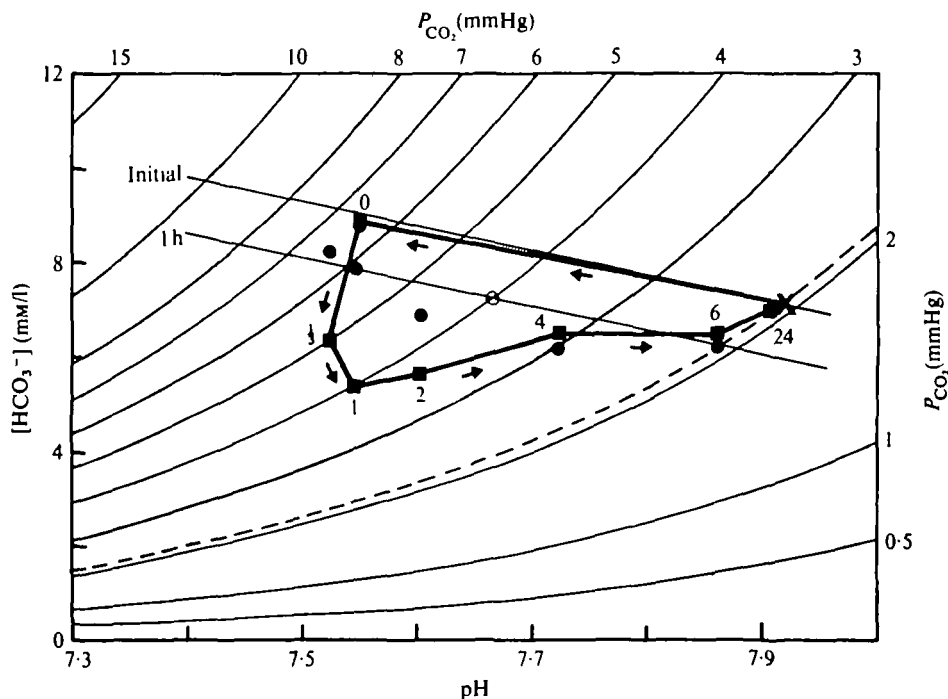

Fig. 4. Davenport diagram display of temporal changes in venous blood acid/base status after 10 min of exhausting activity in a single flounder (weight = 450 g). ■ = observed points; ● = points predicted by the analysis. Note good agreement between observed and predicted points at 0, 4, 6 and 24 h, but not at  $\frac{1}{2}$ , 1 and 2 h. X = initial resting point. Broken line indicates initial  $P_{CO_2} = 2.1$  mmHg isopleth. For illustrative purposes, the initial position of the buffer line and its position at 1 h as predicted by the analysis have been included. ○ indicates point on  $P_{CO_2} = 4$  mmHg isopleth which would have been reached at 1 h if the pH depression at this time were solely due to the measured lactic acid concentration and a  $P_{CO_2} = 4$  mmHg. See text for further details.

difference was of marginal significance for both statistical ( $0.05 < P < 0.10$  by paired Student's two-tailed  $t$ -test) and methodological reasons (the errors involved in direct  $P_{CO_2}$  determination in fish blood at low temperatures). Thus Henderson-Hasselbalch calculations based on measured pH and total  $CO_2$  appear to give reasonable estimates of  $P_{CO_2}$  in flounder blood. On this basis,  $P_{CO_2}$ 's were computed at each sample time for the two fish in which total  $CO_2$  contents were determined throughout the experimental period.

The results were similar for the two animals (Fig. 3 A, B). Venous  $P_{CO_2}$  increased markedly from about 2.0 mmHg, at rest, to 6.5 mmHg immediately after activity.  $P_{CO_2}$  levels gradually declined during recovery, but remained slightly elevated even at 6 h. By 24 h, they had returned to normal. The time course of changes in pH appeared to be inversely correlated with variations in  $P_{CO_2}$ , and not with those in lactate. Total  $CO_2$  in venous blood was elevated at time 0 in concert with the large  $P_{CO_2}$  increase, but subsequently decreased below resting levels despite continuing high  $P_{CO_2}$  levels. This drop in total  $CO_2$  appeared to be at least partially due to the slow post-exercise rise in lactic acid, and was more pronounced in the fish demonstrating higher lactate concentrations. The depression of total  $CO_2$  persisted slightly at 6 h, but had disappeared by 24 h.



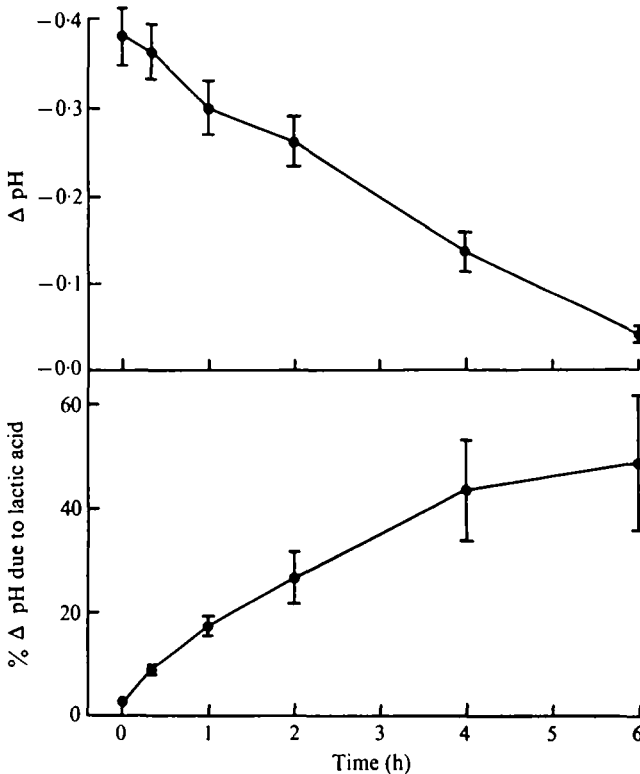

Fig. 5. Total change in venous pH from initial resting value and percentage of this change due to the measured increase in lactic acid concentration alone between 0 and 6 h after 10 min of exhausting activity in *Platichthys stellatus*. Means  $\pm$  1 S.E.  $N = 6$ .

The complete Davenport diagram analysis, as outlined in Methods (Fig. 1), was applied to these two fish for which values for  $P_{CO_2}$  and total  $CO_2$  (and thus  $[HCO_3^-]$ ) were available in addition to lactate and pH data throughout the experimental period (Fig. 4). Again, results were very similar for the two animals. Immediately after exercise (time 0) and later in the recovery period (4 and 6 h), there was good agreement between the observed values of  $[HCO_3^-]$  and those predicted by the analysis on the basis of an acidosis resulting entirely from the combined effects of blood  $P_{CO_2}$  and lactic acid alterations (Fig. 4). At time 0, when the lactate increase was slight (Fig. 3 D), this factor caused almost none of the large drop in pH ( $< 3\%$ ; i.e.  $ac/ab$  of Fig. 1). The abrupt rise in  $P_{CO_2}$  at this time was responsible for virtually all of the acidosis (i.e.  $bc/ab$ ). The animal simply moved up the buffer line to the new  $P_{CO_2}$  (Fig. 4), so the increase in  $HCO_3^-$  was about equal to the product of  $\Delta$  pH and  $\beta$ . At intermediate times (20 min, 1 h, 2 h) the contribution of lactic acid ( $ac/ab$ ) to the total pH change remained modest ( $< 26\%$ ) but the observed values of  $[HCO_3^-]$  were considerably lower than the predicted figures (Fig. 4). Under these circumstances, the remainder of the pH change ( $bc/ab$ ) could not be attributed unequivocally to  $P_{CO_2}$  variation alone (further consideration is given to this discrepancy in the Discussion). Nevertheless, calculations indicate that the prolonged elevation of  $P_{CO_2}$  above resting levels (Fig. 3 A) remained responsible for at least 50% of the total pH depression at these sample times. By 4 and 6 h, the pH decrement was

much reduced, but the rise in lactate (Fig. 3 D) and relative fall in  $P_{\text{CO}_2}$  (Fig. 3 A) mean that the contribution of lactic acid (*ac/ab*) to this reduced acidosis had become significant (e.g. 51% at 4 h in the example shown in Fig. 4), although  $P_{\text{CO}_2}$  remained important.

In the other four fish (for which complete  $P_{\text{CO}_2}$  and total  $\text{CO}_2$  data were lacking) agreement between observed and predicted  $[\text{HCO}_3^-]$ 's could not be examined. Nevertheless, initial  $P_{\text{CO}_2}$  and total  $\text{CO}_2$  figures were available for these animals, so it was still possible to determine that fraction of the total pH change due to lactic acid alone (*ac/ab*) at each sample time. The results were generally similar to those for the first two fish, and the averaged data for all six are presented in Fig. 5. The mean lactate contribution to the total pH change increased from  $2.3 \pm 0.5\%$  at time 0 to  $48.3 \pm 12.8\%$  at 6 h. However, the magnitude of the total pH change markedly decreased over this period (Fig. 5), so the overall influence of lactic acid on blood pH was minor. The large variability at 4 and 6 h reflects the fact that the absolute pH change, on which the calculations were based, had become relatively small by these times (Figs. 3 C, 5).

#### DISCUSSION

As Piiper *et al.* (1972) have pointed out, use of the whole blood buffer value ( $\beta$ ), as in the present study, rather than the true plasma buffer value, is to be preferred for a quantitative analysis of  $\text{H}^+$  ion balance in whole blood. Lactate concentrations were also measured in whole blood. On the other hand, the Henderson-Hasselbalch equation, on which the Davenport diagram is based, is designed for use with true plasma data. The negative relationship between  $\text{CO}_2$  combining capacity and haematocrit *in vitro* suggests that as in the trout (Eddy, 1974),  $[\text{HCO}_3^-]$  inside the erythrocyte of the flounder is low compared with that in plasma (Wood, McMahon & McDonald, unpublished results). Corrections on this basis would result in improved agreement between the initial measured  $P_{\text{CO}_2}$ 's and those calculated by the Henderson-Hasselbalch equation, but would have negligible quantitative effect on the conclusions of the study (i.e. the percentage of the total pH drop due to lactic acid (Fig. 5)).

The post-exercise fall in blood pH of the flounder is clearly of different genesis from that of the mammal. In the latter, the metabolic component (i.e. lactic acid) is of prime importance, whereas in the flounder, the respiratory component (i.e.  $P_{\text{CO}_2}$ ) is dominant, at least in venous blood. The overall contribution of lactic acid is small, and becomes significant only late in recovery when elevated  $P_{\text{CO}_2}$ 's have declined.

The occurrence of a marked respiratory acidosis immediately after exercise may explain the strategy behind the slow time course of post-exercise changes in blood lactic acid in fish. This delay appears to be due to slow transfer of lactate between the bloodstream and the major glycolytic site, white muscle (Black *et al.* 1962; Stevens & Black, 1966). The circulation to white muscle may actually be impaired following strenuous activity in fish (Hayashi, 1961, in Black *et al.* 1962; Wood & Randall, 1973). If the lactate release into the bloodstream were rapid as in mammals, then the peak metabolic acidosis would coincide with the peak respiratory acidosis, resulting in a possibly fatal depression of blood pH. By temporally separating the two phenomena, the fish is able to maintain blood  $\text{H}^+$  ion activity within tolerable limits. These considerations are especially important in view of the generally low buffer capacities of fish blood (Albers, 1970).

Both the resting and post-exercise maximum levels of lactate in *Platichthys stellatus* were considerably lower than previously reported values in other fish (e.g. Secondat & Diaz, 1942; Black *et al.* 1959, 1962, 1966; Stevens & Black, 1966; Piiper *et al.* 1972). These differences could be of methodological origin or reflect real inter-species variation. In the present study, care was taken to ensure that the animals were completely quiet both before and after exercise, and blood samples were drawn without disturbance via indwelling cannulae (cf. Driedzic & Kiceniuk, 1976).

The procedure used to exhaust the flounder would have had little effect on many other teleosts, and one wonders why the exercise capacity is so low. Inadequacy of  $O_2$  transport does not appear to be the primary factor, for there was little difference in exercise performance and post-exercise lactate levels between normal and severely anaemic flounder (Wood, McMahon & McDonald, unpublished results). The answer may be that the drastic rise in  $P_{CO_2}$  during activity quickly reduces pH to a level which limits vital metabolic reactions. High  $P_{CO_2}$  and low pH may cause secondary problems in  $O_2$  delivery – e.g. the Bohr and Root effects (Riggs, 1970), decreased myocardial contractility (Poupa & Johansen, 1975), and increased blood viscosity associated with erythrocytic swelling (Ferguson & Black, 1941; Eddy, 1974). This swelling was clearly seen in the present study, for haematocrit increased with high  $P_{CO_2}$  *in vitro*, and *in vivo* at the times of maximum  $P_{CO_2}$  (Fig. 3 E).

The pH data for the single animal in which both arterial and venous measurements were made (Fig. 3 C) strongly indicate that  $P_{a,CO_2}$  varied in similar fashion to  $P_{v,CO_2}$ , although the absolute changes were smaller. From the log  $P_{CO_2}$ /pH relationship of Fig. 2 B, it can be roughly estimated that  $P_{a,CO_2}$  rose from 2.1 to 5.5 mmHg immediately after exercise, and  $P_{v,CO_2}$  from 2.4 to 9.0 mmHg, resulting in an increased  $a-v$  pH difference.  $P_{a,CO_2}$  also increased after exhausting activity in the dogfish (Piiper *et al.* 1972).

The large elevation of  $P_{v,CO_2}$  levels after activity in the flounder is explicable by high rates of tissue  $CO_2$  production. Because the  $CO_2$  combining curve of flounder blood markedly flattens above about 4 mmHg  $P_{CO_2}$  (Fig. 2 A), rather small increases in total  $CO_2$  content will be associated with large increases in  $P_{v,CO_2}$ . An increase in  $P_{a,CO_2}$  after exercise may reflect a limitation of  $CO_2$  excretion due to a decrease in blood residence time at the gills associated with an elevated cardiac output (Cameron & Polhemus, 1974).

In Results, it was noted that at 20 min, 1 h and 2 h, the observed  $[HCO_3^-]$ 's were considerably lower than those predicted by the analysis (Fig. 4). A number of possible explanations exist. Firstly, it is conceivable, though unlikely, that the addition of lactic acid to the blood may have altered  $\beta$ , so that the predicted  $[HCO_3^-]$  was in error (Davenport, 1974). However, trout blood showed no change in  $\beta$  after addition of comparable amounts of hydrochloric acid (Eddy, 1976). A second possibility would be a selective removal of the lactate ion from the bloodstream unaccompanied by an  $H^+$  ion; we are aware of no evidence that this ever occurs. Manipulation of  $H^+$  and/or  $HCO_3^-$  fluxes between the blood and the tissues or external environment (branchial, urinary fluxes) so as to adjust pH in the face of elevated  $P_{CO_2}$ 's is another explanation (Piiper *et al.* 1972; Cameron, 1976; Randall, Heisler & Drees, 1976). However, this also seems most improbable because the net effect appears disadvantageous – e.g. in Fig. 4 at 1 h the pH (7.545) at the observed

Table 1. *Changes in the concentration of lactic acid and a hypothetical metabolic acid<sup>a</sup> at 0-6 h after exhausting activity in Platichtys stellatus*

| Time<br>(h)   | $\Delta$ Lactic acid<br>(mm l <sup>-1</sup> ) | $\Delta$ Hypothetical acid<br>(mm l <sup>-1</sup> ) |
|---------------|-----------------------------------------------|-----------------------------------------------------|
| 0             | +0.23                                         | +0.35                                               |
| $\frac{1}{2}$ | +0.70                                         | +1.39                                               |
| 1             | +0.96                                         | +1.52                                               |
| 2             | +1.28                                         | +0.99                                               |
| 4             | +1.26                                         | -0.04                                               |
| 6             | +0.69                                         | -0.14                                               |

Mean values for the two animals of Fig. 3A, B.  $\Delta$  Hypothetical acid was calculated as the difference between the observed  $[\text{HCO}_3^-]$  and the  $[\text{HCO}_3^-]$  predicted by the Davenport diagram analysis at the measured pH (see Figs. 1, 4).

$P_{\text{CO}_2} = 4$  mmHg was lower than it would have been at this  $P_{\text{CO}_2}$  had there been no such adjustment (7.668). The most likely explanation is that some other metabolic acid(s) besides lactic was entering the blood in significant amounts at these sample times, resulting in depression of the buffer line and an additional base deficit. On this assumption, the concentration of this hypothetical acid in the blood at each sample time has been calculated as the difference in base deficit (Table 1).

The substance apparently occurs in similar amounts to lactic acid, but enters and leaves the blood over a more rapid time course (Table 1). A peak is reached at about 1 h, and the substance is undetectable by 4 h. As with lactic acid, its contribution to the acidosis is modest, and raised  $P_{\text{CO}_2}$  levels remain responsible for at least 50% of the total pH depression at 20 min, 1 h and 2 h. The identity of this hypothetical acid(s) is unknown, but it is interesting to note that Driedzic & Hochachka (1976) have recently reported evidence for the release of  $\text{NH}_4^+$  ions from white muscle after strenuous activity in the carp. Ammonium chloride produces metabolic acidosis in mammals (Davenport, 1974).

We thank the Director, Dr A. O. D. Willows, and staff of Friday Harbor Laboratories, University of Washington, for their assistance and hospitality. The advice of Dr D. J. Randall is greatly appreciated. Mr G. Hewlitt, of the Vancouver Public Aquarium, kindly supplied 'Furanace'. Financial support was provided by grants from the National Research Council of Canada.

#### REFERENCES

- ALBERS, C. (1970). Acid-base balance. In *Fish Physiology*, vol. iv (ed. W. S. Hoar and D. J. Randall). New York: Academic Press Inc.
- ASTRAND, P. & RODAHL, K. (1970). *Textbook of Work Physiology*. New York: McGraw-Hill Book Co.
- AUVERGNAT, R. & SECONDAT, M. (1942). Retentissement plasmatique de l'exercice musculaire chez la Carpe (*Cyprinus carpio* L.). *C. r. hebd. Séanc. Acad. Sci., Paris* **215**, 92-4.
- BANG, O. (1936). The lactate content of the blood during and after muscular exercise in man. *Skand. Arch. für Physiol., Suppl.* **10**, 49-82.
- BLACK, E. C., CHIU, W., FORBES, F. D. & HANSLIP, A. (1959). Changes in pH, carbonate and lactate of the blood of yearling Kamloops trout, *Salmo gairdneri*, during and following severe muscular activity. *J. Fish. Res. Bd Can.* **16**, 391-402.
- BLACK, E. C., CONNOR, A. R., LAM, K. & CHIU, W. (1962). Changes in glycogen, pyruvate, and lactate in rainbow trout (*Salmo gairdneri*) during and following muscular activity. *J. Fish. Res. Bd Can.* **19**, 409-36.

- BLACK, E. C., MANNING, G. T. & HAYASHI, K. (1966). Changes in levels of hemoglobin, oxygen, carbon dioxide, pyruvate and lactate in venous blood of rainbow trout (*Salmo gairdneri*) during and following severe muscular activity. *J. Fish. Res. Bd Can.* **23**, 783-95.
- CAMERON, J. N. (1971). Rapid method for determination of total carbon dioxide in small blood samples. *J. appl. Physiol.* **31**, 632-4.
- CAMERON, J. N. (1976). Branchial ion uptake in Arctic grayling: resting values and effects of acid-base disturbance. *J. exp. Biol.* **64**, 711-20.
- CAMERON, J. N. & POLHEMUS, J. A. (1974). Theory of CO<sub>2</sub> exchange in trout gills. *J. exp. Biol.* **60**, 183-94.
- CRESCITELLI, F. & TAYLOR, C. (1944). The lactate response to exercise and its relationship to physical fitness. *Am. J. Physiol.* **141**, 630-40.
- DAVENPORT, H. W. (1974). *The ABC of Acid-Base Chemistry* 6th edn. Chicago: The University of Chicago Press.
- DRIEDZIC, W. R. & HOCHACHKA, P. W. (1976). Control of energy metabolism in fish white muscle. *Am. J. Physiol.* **230**, 579-82.
- DRIEDZIC, W. R. & KICENIUK, J. W. (1976). Blood lactate levels in free-swimming rainbow trout (*Salmo gairdneri*) before and after strenuous exercise resulting in fatigue. *J. Fish. Res. Bd Can.* **33**, 173-6.
- EDDY, F. B. (1974). *In vitro* blood carbon dioxide of the rainbow trout (*Salmo gairdneri*). *Comp. Biochem. Physiol.* **47A**, 129-40.
- EDDY, F. B. (1976). Acid-base balance in rainbow trout (*Salmo gairdneri*) subjected to acid stresses. *J. exp. Biol.* **65**, 159-71.
- FERGUSON, J. K. W. & BLACK, E. C. (1941). The transport of CO<sub>2</sub> in the blood of certain freshwater fishes. *Biol. Bull. mar. biol. Lab., Woods Hole* **80**, 139-52.
- KEUL, I., KEPPLER, D. & DOLL, E. (1967). Standard bicarbonate, pH, lactate, and pyruvate concentrations during and after muscular exercise. *German Medical Monthly* **12**, 156.
- LAUG, E. P. (1934). Observations on lactic acid, total CO<sub>2</sub>, and pH of venous blood during recovery from severe exercise. *Am. J. Physiol.* **107**, 687-92.
- PIPER, J., MEYER, M. & DREES, F. (1972). Hydrogen ion balance in the elasmobranch *Scyliorhinus stellaris* after exhausting activity. *Respir. Physiol.* **16**, 290-303.
- POUPA, O. & JOHANSEN, K. (1975). Adaptive tolerance of fish myocardium to hypercapnic acidosis. *Am. J. Physiol.* **228**, 683-8.
- RANDALL, D. J. & CAMERON, J. N. (1973). Respiratory control of arterial pH as temperature changes in rainbow trout *Salmo gairdneri*. *Am. J. Physiol.* **225**, 997-1002.
- RANDALL, D. J., HEISLER, N. & DREES, F. (1976). Ventilatory response to hypercapnia in the larger spotted dogfish *Scyliorhinus stellaris*. *Am. J. Physiol.* **230**, 590-4.
- RIGGS, A. (1970). Properties of fish hemoglobins. In *Fish Physiology*, vol. iv (ed. W. S. Hoar and D. J. Randall). New York: Academic Press Inc.
- SECONDAT, M. & DIAZ, D. (1942). Recherches sur la lactacidémie chez le Poisson d'eau douce. *C. r. hebdom. Séanc. Acad. Sci., Paris* **215**, 71-3.
- SEVERINGHAUS, J. W. (1965). *Handbook of Physiology*, Section 3, *Respiration* **2**, 1480.
- STEVENS, E. D. & BLACK, E. C. (1966). The effect of intermittent exercise on carbohydrate metabolism in rainbow trout, *Salmo gairdneri*. *J. Fish. Res. Bd Can.* **23**, 471-85.
- STEVENS, E. D. & RANDALL, D. J. (1967). Changes of gas concentrations in blood and water during moderate swimming activity in rainbow trout. *J. exp. Biol.* **46**, 329-37.
- VISSER, B. F., KREUKNIET, J. & MAAS, A. H. (1964). Increase of whole blood lactic acid concentration during exercise as predicted from pH and P<sub>CO<sub>2</sub></sub> determinations. *Pflügers Archiv. ges. Physiol.* **281**, 300-4.
- WATTERS, K. W. Jr. & SMITH, L. S. (1973). Respiratory dynamics of the starry flounder *Platichthys stellatus* in response to low oxygen and high temperature. *Marine Biology* **19**, 133-48.
- WOOD, C. M. & RANDALL, D. J. (1973). The influence of swimming activity on sodium balance in the rainbow trout (*Salmo gairdneri*). *J. comp. Physiol.* **82**, 207-33.
- WOODBURY, J. W. (1965). Regulation of pH. In *Physiology and Biophysics* (ed. T. C. Ruch and H. D. Patton). Philadelphia: W. B. Saunders Co.
